# Supplementary material for: Structural basis of peptidomimetic agonism revealed by small-molecule GLP-1R agonists Boc5 and WB4-24
Source: PubMed Central journal article supplement — Proc Natl Acad Sci U S A. 2022 May 13;119(20):e2200155119. doi: 10.1073/pnas.2200155119 (PMC9171782; doi:10.1073/pnas.2200155119), 2022-05-13
Supplement: pnas.2200155119.sapp.pdf [file pnas.2200155119.sapp.pdf]

## Supporting Information

### **Structural basis of peptidomimetic agonism revealed by small-molecule GLP-1R agonists Boc5 and WB4-24**

Zhaotong Cong<sup>a,1</sup>, Qingtong Zhou<sup>a,1</sup>, Yang Li<sup>a</sup>, Li-Nan Chen<sup>b,c</sup>, Zi-Chen Zhang<sup>d</sup>, Anyi Liang<sup>e</sup>, Qing Liu<sup>f</sup>, Xiaoyan Wu<sup>f</sup>, Antao Dai<sup>f</sup>, Tian Xia<sup>e</sup>, Wei Wu<sup>d</sup>, Yan Zhang<sup>b,c</sup>, Dehua Yang<sup>f,g,h,i,2</sup>, Ming-Wei Wang<sup>a,f,g,h,i,j,2</sup>

<sup>a</sup>Department of Pharmacology, School of Basic Medical Sciences, Fudan University, Shanghai 200032, China; <sup>b</sup>Department of Biophysics of Sir Run Run Shaw Hospital, Zhejiang University School of Medicine, Hangzhou 310058, China; <sup>c</sup>Department of Pathology of Sir Run Run Shaw Hospital, Zhejiang University School of Medicine, Hangzhou 310058, China; <sup>d</sup>School of Pharmacy, Fudan University, Shanghai 201203, China; <sup>e</sup>School of Artificial Intelligence and Automation, Huazhong University of Science and Technology, Wuhan 430074, China; <sup>f</sup>The National Center for Drug Screening, Shanghai Institute of Materia Medica, Chinese Academy of Sciences, Shanghai 201203, China; <sup>g</sup>School of Graduate Studies, University of Chinese Academy of Sciences, Beijing 100049, China; <sup>h</sup>The CAS Key Laboratory of Receptor Research, Shanghai Institute of Materia Medica, Chinese Academy of Sciences, Shanghai 201203, China; <sup>i</sup>Department of Bioactivity Screening, Research Center for Deepsea Bioresources, Sanya, Hainan 572025, China; <sup>j</sup>Department of Chemistry, School of Science, The University of Tokyo, Tokyo 113-0033, Japan.

<sup>1</sup>Z.C. and Q.Z. contributed equally to this work.

<sup>2</sup>To whom correspondence may be addressed: dhyang@simm.ac.cn or mwwang@simm.ac.cn

#### **This PDF file includes:**

Figures S1 to S9  
Tables S1 to S5

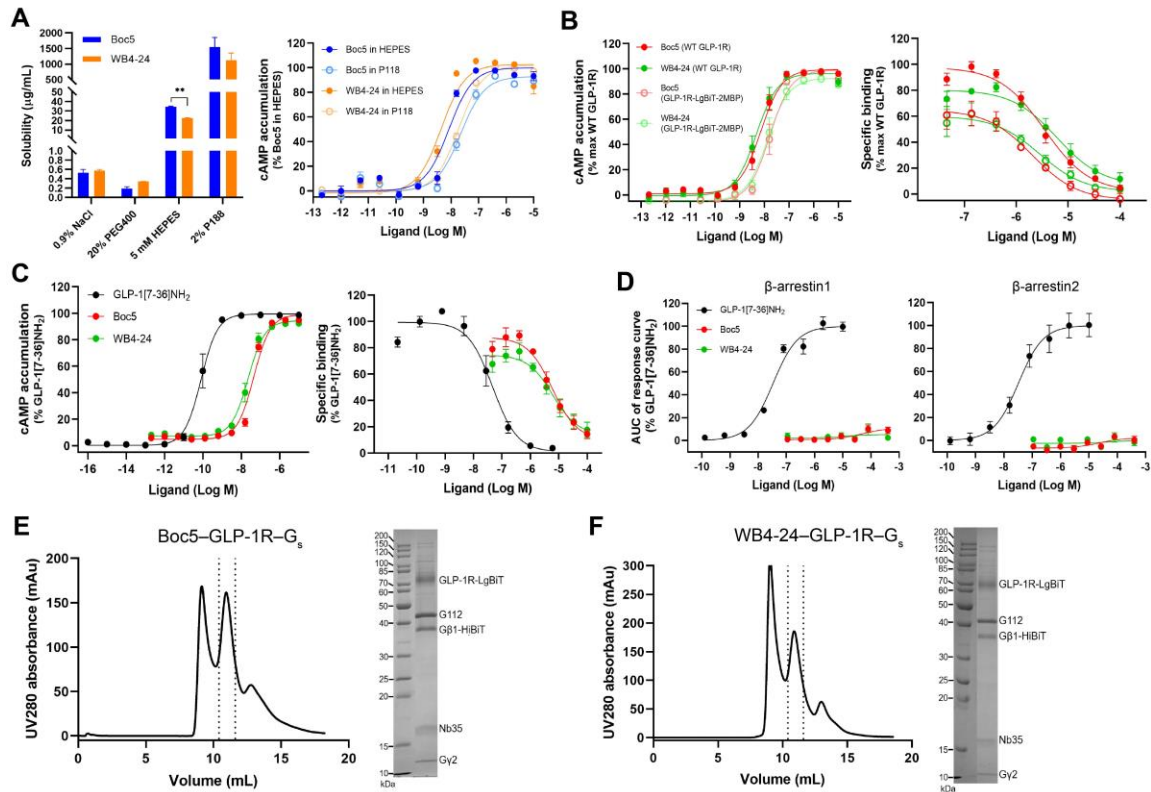

**Fig. S1. Characterization of non-peptidic GLP-1R agonists and purification of Boc5- and WB4-24-bound GLP-1R-G<sub>s</sub> complexes.** (A) Solubility of Boc5 and WB4-24 in different solvents (left). The surfactant P188 had no significant influence on Boc5 and WB4-24 induced receptor activation (right). (B) cAMP responses following Boc5 and WB4-24 stimulation in HEK293T cells transfected with the wild-type (WT) or modified GLP-1R constructs (left). Binding of Boc5 and WB4-24 to the WT or modified GLP-1R in competition with <sup>125</sup>I-GLP-1 (right). (C, D) GLP-1, Boc5 and WB4-24 induced cAMP accumulation (C) and  $\beta$ -arrestin 1/2 recruitment (D). The color key at the upper left corner provides ligand information for each assay. (E, F) Size-exclusion chromatography elution profile and corresponding SDS-PAGE gel of the Boc5-GLP-1R-G<sub>s</sub>-Nb35 (E) and WB4-24-GLP-1R-G<sub>s</sub>-Nb35 (F) complexes. G112 is an engineered G $\alpha_s$  protein. Data are shown as means  $\pm$  SEM from at least three independent experiments.

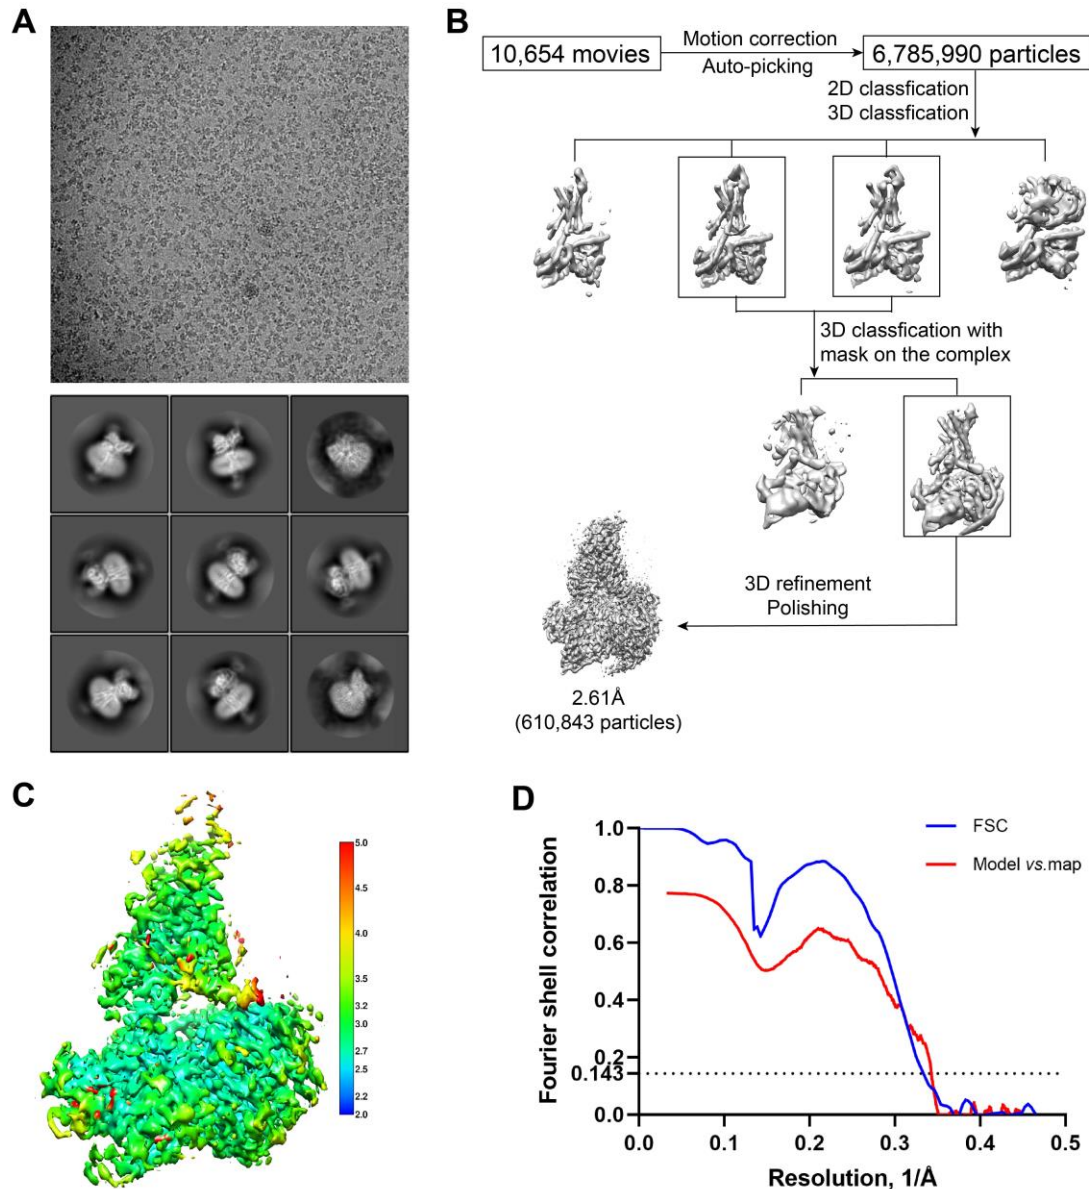

**Fig. S2. Cryo-EM data processing and validation of the Boc5-GLP-1R-G<sub>s</sub>-Nb35 complex.** (A) Representative cryo-EM micrograph and two-dimensional class averages. (B) Flow chart of cryo-EM data processing. (C) Local resolution distribution map of the complex. (D) Fourier shell correlation (FSC) curve of the overall refined receptor.

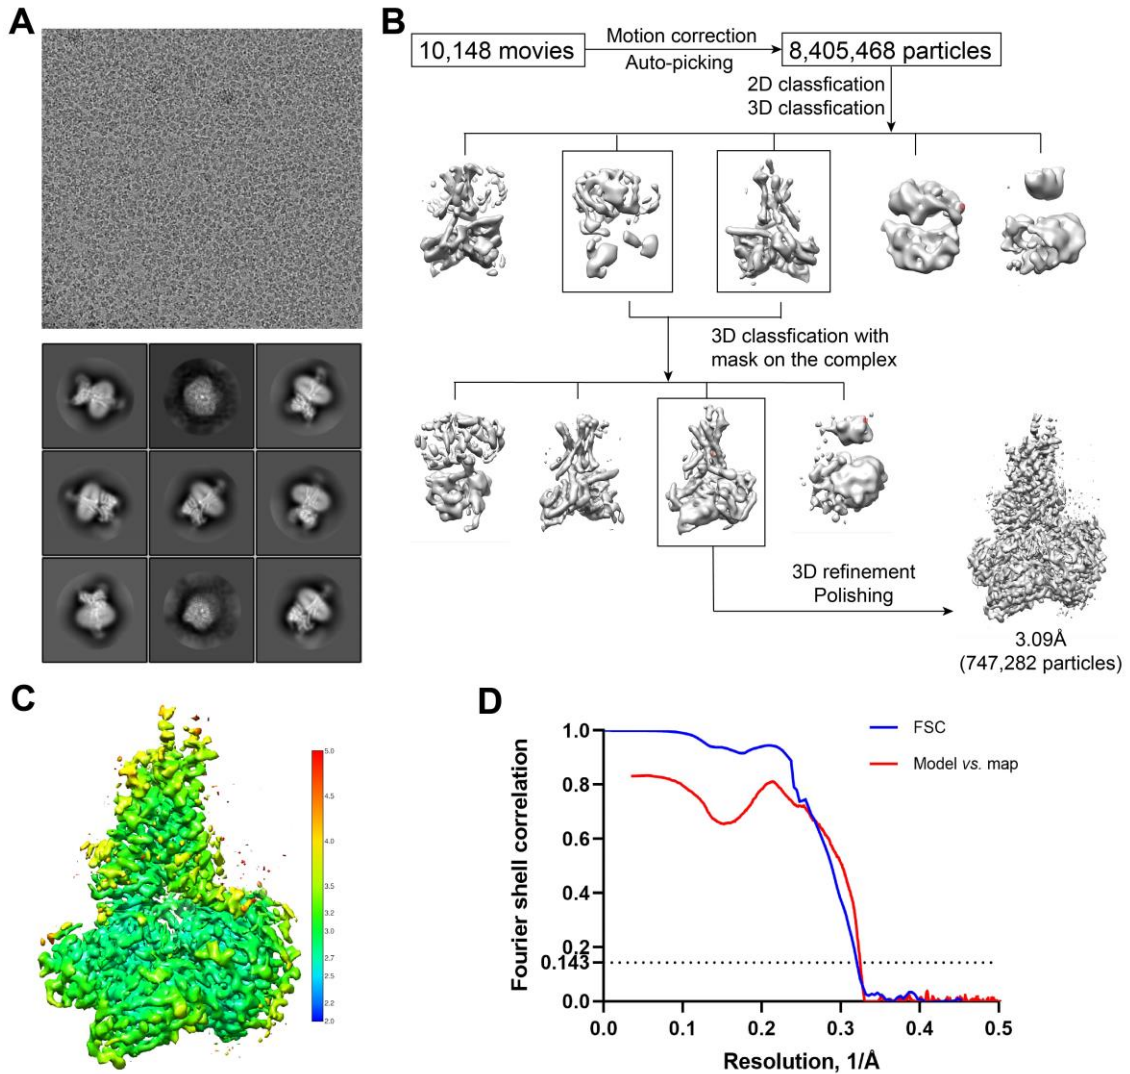

**Fig. S3. Cryo-EM data processing and validation of the WB4-24-GLP-1R-G<sub>s</sub>-Nb35 complex.** (A) Representative cryo-EM micrograph and two-dimensional class averages. (B) Flow chart of cryo-EM data processing. (C) Local resolution distribution map of the complex. (D) FSC curves of the overall refined receptor.

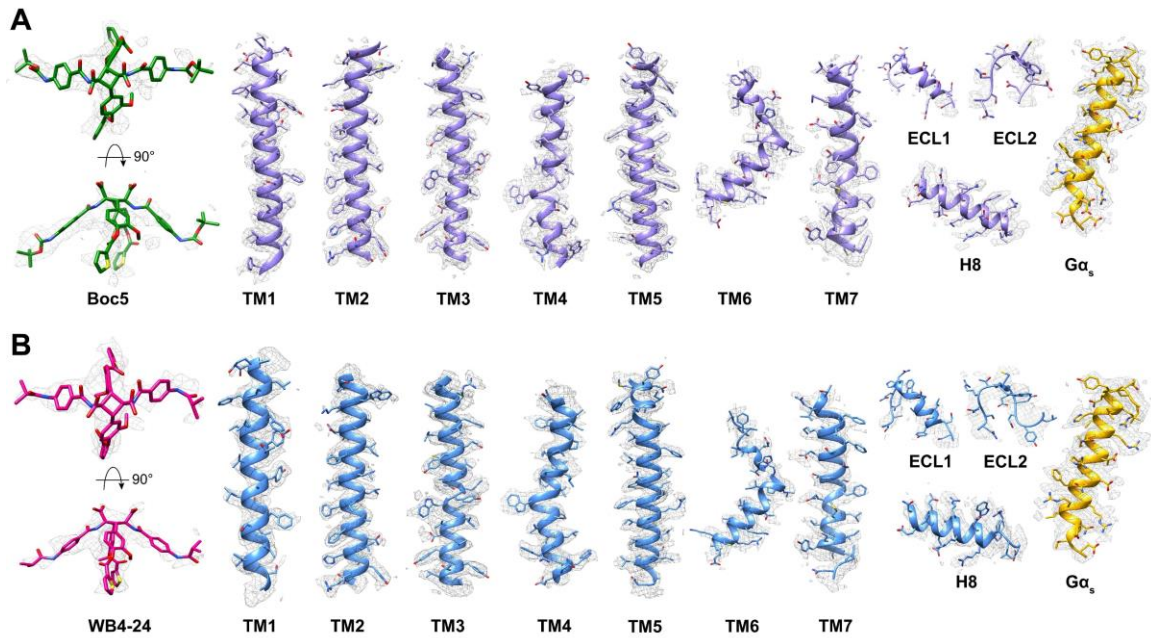

**Fig. S4. Cryo-EM density maps of the Boc5- and WB4-24-bound GLP-1R–G<sub>s</sub> structures.** (A) Cryo-EM density map and model of the Boc5–GLP-1R–G<sub>s</sub> structure are shown for Boc5, all seven-transmembrane (TM)  $\alpha$ -helices, ECL1, ECL2, helix 8 (H8) of GLP-1R, and  $\alpha$ 5-helix of G<sub>s</sub>. (B) Cryo-EM density map and model of the WB4-24–GLP-1R–G<sub>s</sub> structure are shown for WB4-24, all TM  $\alpha$ -helices, ECL1, ECL2, H8 of GLP-1R, and  $\alpha$ 5-helix of G<sub>s</sub>.



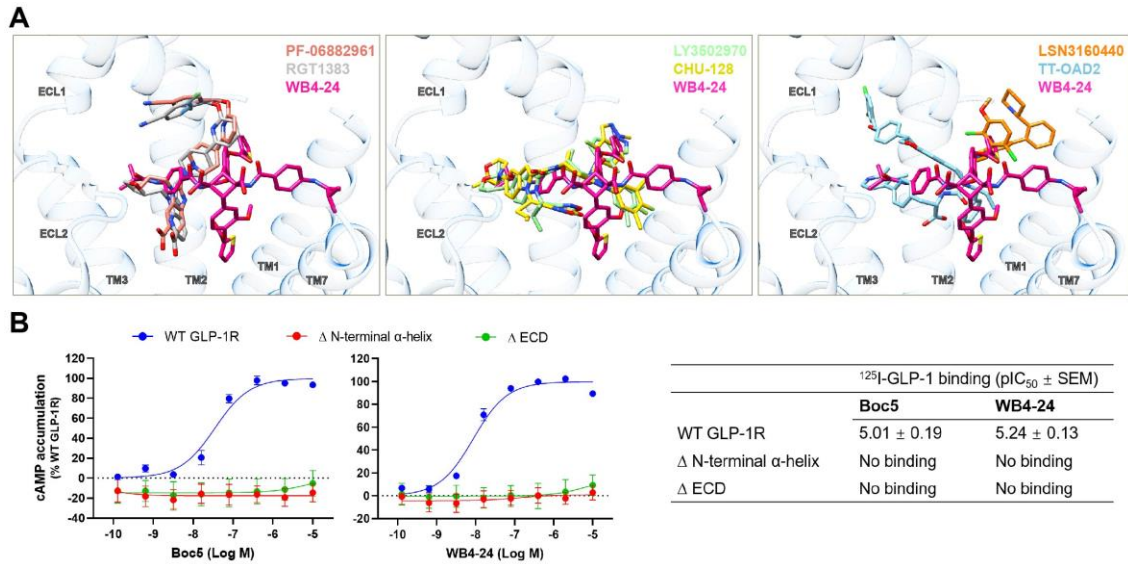

**Fig. S5. Comparison of binding modes of WB4-24 and other small-molecule GLP-1R agonists.** (A) All structures were overlay with that of WB4-24-bound GLP-1R colored in blue. Each ligand is shown with different color (WB4-24, magenta; PF-06882961, salmon; RGT1383, gray; LY3502970, light green; CHU-128, yellow; TT-OAD2, sky blue; and LSN3160440, orange red). (B) Signaling profiles of Boc5 and WB4-24 at GLP-1R with the N-terminal  $\alpha$ -helix or ECD truncation. Boc5 and WB4-24 concentration-response curves were derived from cAMP production assay. Binding data were normalized to the maximal binding of <sup>125</sup>I-GLP-1 and shown as pIC<sub>50</sub> (the negative logarithm of binding affinity). Data are shown as means  $\pm$  SEM of at least four independent experiments performed in quadruplicate. WT, wild-type;  $\Delta$ , truncation.

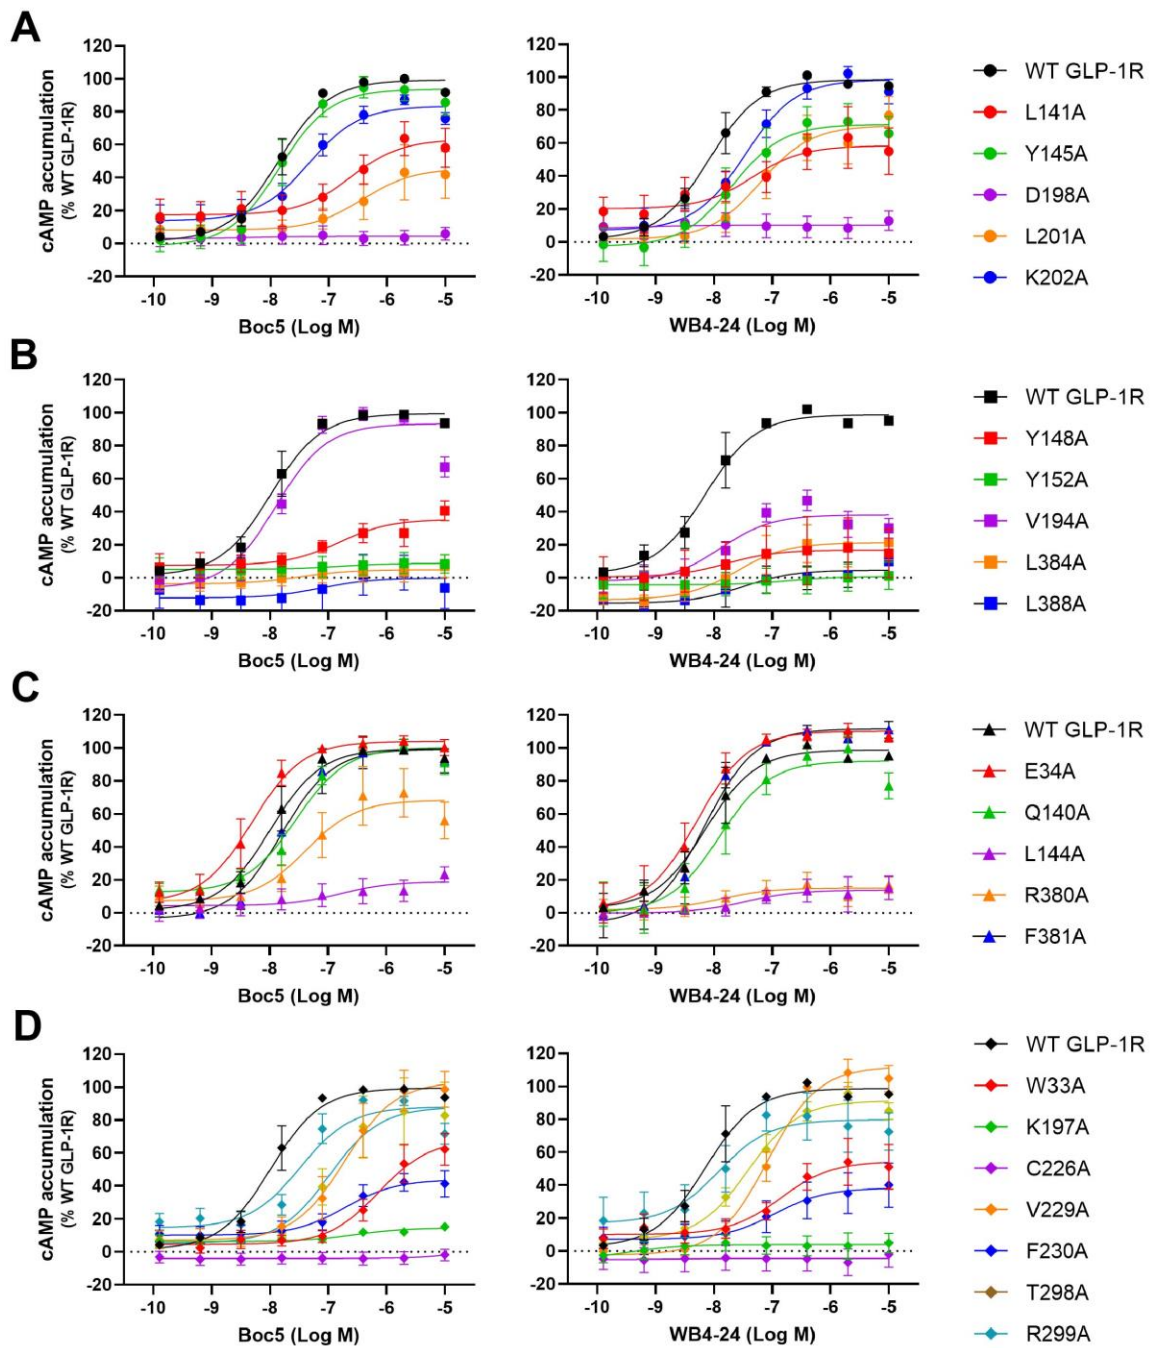

**Fig. S6. Ligand mediated cAMP accumulation at wild-type (WT) or mutant GLP-1R.** Concentration-response curves for alanine mutation of residues interacting with arms A1-1 (**A**), A1-2 (**B**), B1-1 or B2-1 (**C**), and B2-1 or B2-2 (**D**) of Boc5 and WB4-24. Data are shown as means  $\pm$  SEM of at least four independent experiments performed in quadruplicate.

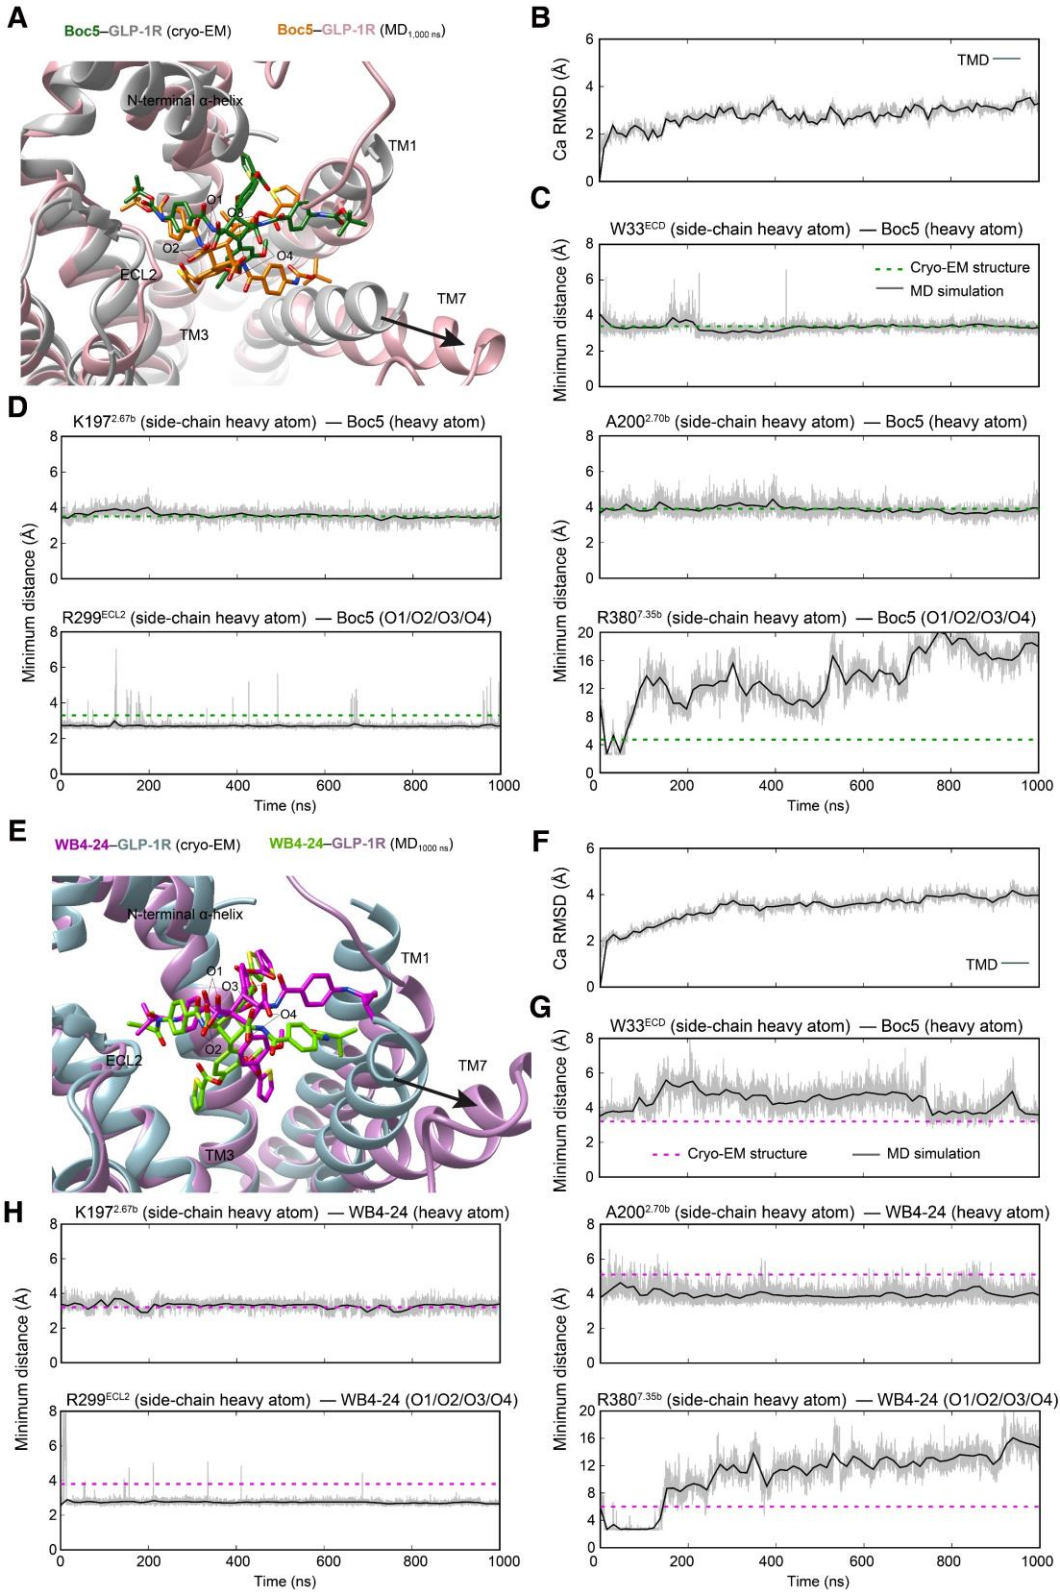



**Fig. S7. Molecular dynamics (MD) simulations of Boc5 or WB4-24-bound active GLP-1R.** (A) Comparison of the Boc5 conformation between simulation snapshot and the cryo-EM structure. (B) Root mean square deviation (RMSD) of C $\alpha$  positions of the GLP-1R TMD, where all snapshots were superimposed on the cryo-EM structure of Boc5-bound GLP-1R TMD using the C $\alpha$  atoms. (C) Minimum distance between the heavy atoms of Boc5 and the ECD residue W33 suggests that Boc5 steadily interacts with the N-terminal  $\alpha$ -helix of ECD. (D) Analysis of the MD simulation trajectories in (A): representative minimum distances between the heavy atoms of Boc5 and TMD residues (top left, K197<sup>2.67b</sup>—Boc5; top right, A200<sup>2.70b</sup>—Boc5; bottom left, R299<sup>ECL2</sup>—O1/O2/O3/O4 in Boc5; bottom right, R380<sup>7.45b</sup>—O1/O2/O3/O4 in Boc5). (E) Comparison of the WB4-24 conformation between simulation snapshot and the cryo-EM structure. (F) RMSD of C $\alpha$  positions of the GLP-1R TMD, where all snapshots were superimposed on the cryo-EM structure of WB4-24-bound GLP-1R TMD using the C $\alpha$  atoms. (G) Minimum distance between the heavy atoms of WB4-24 and the ECD residue W33. (H) Analysis of the MD simulation trajectories in (E): representative minimum distances between the heavy atoms of WB4-24 and TMD residues (top left, K197<sup>2.67b</sup>—WB4-24; top right, A200<sup>2.70b</sup>—WB4-24; bottom left, R299<sup>ECL2</sup>—O1/O2/O3/O4 in WB4-24; bottom right, R380<sup>7.45b</sup>—O1/O2/O3/O4 in WB4-24). The thick and thin traces represent moving averages and original, unsmoothed values, respectively.

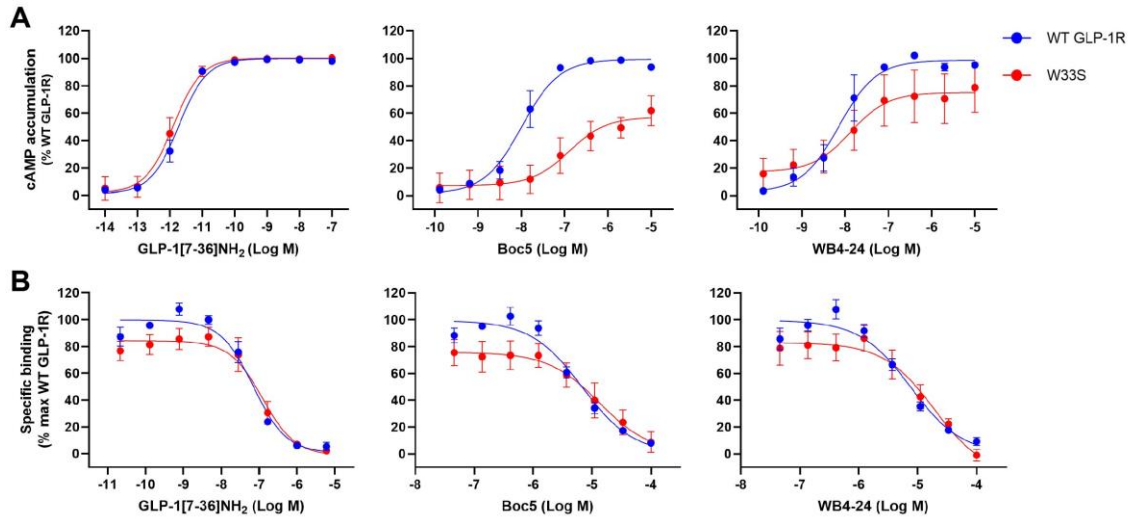

**Fig. S8. Signaling profiles of GLP-1, Boc5, and WB4-24 at W33S mutant. (A)** cAMP accumulation induced by GLP-1, Boc5 and WB4-24 at wild-type (WT) and mutant GLP-1Rs. **(B)** Specific binding of GLP-1, Boc5 and WB4-24 to the WT and mutant GLP-1Rs in competition with <sup>125</sup>I-GLP-1. Data are shown as means ± SEM from at least three independent experiments.

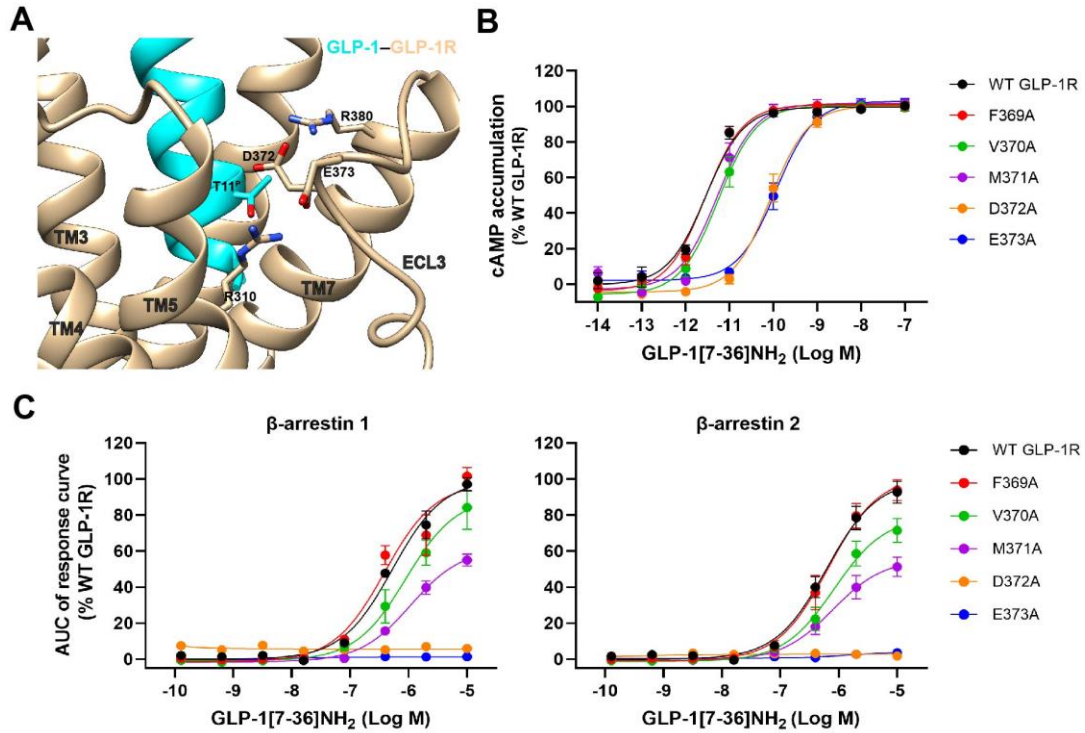

**Fig. S9. ECL3 conformation is important for biased signaling at GLP-1R.** In the GLP-1-bound structure (PDB code: 6X18), ECL3 is stabilized by the intra-receptor interactions among R310<sup>5,40b</sup>, D372<sup>ECL3</sup>, E373<sup>ECL3</sup> and R380<sup>7,35b</sup>, as well as that between ligand and receptor including D372<sup>ECL3</sup> and T11<sup>P</sup> (**A**). Alanine mutations of D372<sup>ECL3</sup> and E373<sup>ECL3</sup> made negligible influence on the maximal response of cAMP accumulation (**B**), but completely abolished the  $\beta$ -arrestin 1/2 recruitment (**C**). Data are shown as means  $\pm$  SEM of at least four independent experiments performed in quadruplicate. WT, wild-type.

**Table S1. Cryo-EM data collection, model refinement and validation statistics.**

| <b>Data collection and processing</b>     | <b>Boc5-GLP-1R-G<sub>s</sub>-Nb35</b> | <b>WB4-24-GLP-1R-G<sub>s</sub>-Nb35</b> |
|-------------------------------------------|---------------------------------------|-----------------------------------------|
| Magnification                             | 130,000                               | 130,000                                 |
| Voltage (kV)                              | 300                                   | 300                                     |
| Electron exposure (e-/Å <sup>2</sup> )    | 80                                    | 80                                      |
| Defocus range (μm)                        | -1.2 to -2.2                          | -1.2 to -2.2                            |
| Pixel size (Å)                            | 1.071                                 | 1.071                                   |
| Symmetry imposed                          | C1                                    | C1                                      |
| Initial particle image (no.)              | 6,785,990                             | 8,405,468                               |
| Final particle image (no.)                | 610,843                               | 747,282                                 |
| Map resolution (Å)                        | 2.61                                  | 3.09                                    |
| FSC threshold                             | 0.143                                 | 0.143                                   |
| Map resolution range (Å)                  | 2.5-4.9                               | 2.2-4.0                                 |
| <b>Refinement</b>                         |                                       |                                         |
| Initial model used (PDB code)             | 6X19                                  | 6X19                                    |
| Model resolution (Å)                      | 2.7                                   | 3.03                                    |
| FSC threshold                             | 0.5                                   | 0.5                                     |
| Map sharpening B factor (Å <sup>2</sup> ) | -82.56                                | -82.56                                  |
| Model composition                         |                                       |                                         |
| Non-hydrogen atom                         | 8,493                                 | 8,047                                   |
| Protein residue                           | 1,051                                 | 1,019                                   |
| B factors (Å <sup>2</sup> )               |                                       |                                         |
| Protein                                   | 46.54                                 | 93.64                                   |
| Root mean square deviation                |                                       |                                         |
| Bond length (Å)                           | 0.003                                 | 0.004                                   |
| Bond angle (°)                            | 0.642                                 | 0.679                                   |
| Validation                                |                                       |                                         |
| MolProbity score                          | 1.59                                  | 1.39                                    |
| Clash score                               | 7.32                                  | 3.50                                    |
| Poor rotamer (%)                          | 0.11                                  | 0.0                                     |
| Ramachandran plot                         |                                       |                                         |
| Favored (%)                               | 96.90                                 | 96.31                                   |
| Allowed (%)                               | 3.10                                  | 3.69                                    |
| Disallowed (%)                            | 0.0                                   | 0.0                                     |



**Table S2. *In vitro* pharmacology of GLP-1, Boc5 and WB4-24 at wild-type and mutant GLP-1R constructs.**

|                          | cAMP              |                  | Binding     | $\beta$ -arrestin 1 |                  | $\beta$ -arrestin 2 |                  |
|--------------------------|-------------------|------------------|-------------|---------------------|------------------|---------------------|------------------|
|                          | pEC <sub>50</sub> | E <sub>max</sub> | pKi         | pEC <sub>50</sub>   | E <sub>max</sub> | pEC <sub>50</sub>   | E <sub>max</sub> |
| <b>WT GLP-1R</b>         |                   |                  |             |                     |                  |                     |                  |
| GLP-1                    | 10.09 ± 0.06      | 99.53 ± 1.67     | 7.44 ± 0.14 | 7.47 ± 0.09         | 100 ± 3.01       | 7.48 ± 0.14         | 100 ± 4.71       |
| Boc5                     | 7.35 ± 0.05       | 99.06 ± 1.86     | 5.50 ± 0.11 | 4.30 ± 0.41         | 10.91 ± 2.78     | 4.64 ± 0.49         | 2.76 ± 2.54      |
| WB4-24                   | 7.64 ± 0.05       | 94.47 ± 1.67     | 5.40 ± 0.12 | 5.02 ± 1.56         | 5.26 ± 2.56      | NA                  | NA               |
| <b>GLP-1R-LgBiT-2MBP</b> |                   |                  |             |                     |                  |                     |                  |
| GLP-1                    | ND                | ND               | ND          | ND                  | ND               | ND                  | ND               |
| Boc5                     | 7.78 ± 0.07       | 98.94 ± 2.63     | 5.99 ± 0.11 | ND                  | ND               | ND                  | ND               |
| WB4-24                   | 7.87 ± 0.08       | 92.59 ± 2.75     | 6.00 ± 0.09 | ND                  | ND               | ND                  | ND               |

The functional potency (EC<sub>50</sub>) and (E<sub>max</sub>) values for cAMP accumulation and  $\beta$ -arrestin recruitment assays were analyzed using a three-parameter logistic equation. pEC<sub>50</sub> is the negative logarithm of the molar concentration of agonist that induced half the maximal response. E<sub>max</sub> is expressed as a percentage of the response induced by GLP-1. Binding data were analyzed using a three-parameter logistic equation and normalized to the maximal binding of <sup>125</sup>I-GLP-1. pKi is the negative logarithm of peptide affinity. All values are means ± SEM of at least three independent experiments conducted in quadruplicate (cAMP accumulation) or duplicate (binding assay and  $\beta$ -arrestin recruitment). WT, wild-type; ND, not determined; NA, not active.

**Table S3. Effects of residue mutation in the ligand binding pocket on cAMP accumulation.**

| GLP-1R residue                       | Boc5              |                  | WB4-24            |                  |
|--------------------------------------|-------------------|------------------|-------------------|------------------|
|                                      | pEC <sub>50</sub> | E <sub>max</sub> | pEC <sub>50</sub> | E <sub>max</sub> |
| <b>Interaction with A-1</b>          |                   |                  |                   |                  |
| WT GLP-1R                            | 7.86 ± 0.09       | 99.28 ± 2.63     | 8.08 ± 0.10       | 98.57 ± 2.92     |
| L141 <sup>1.36b</sup> A              | 6.63 ± 0.39**     | 63.12 ± 8.05**   | 7.34 ± 0.54**     | 58.35 ± 7.23**   |
| Y145 <sup>1.40b</sup> A              | 7.84 ± 0.16       | 93.75 ± 4.12     | 7.68 ± 0.29*      | 71.41 ± 7.01**   |
| D198 <sup>2.68b</sup> A              | NA**              | 4.43 ± 2.33**    | NA**              | 10.28 ± 2.97**   |
| L201 <sup>2.71b</sup> A              | 6.42 ± 0.49**     | 45.48 ± 8.98**   | 7.20 ± 0.25**     | 70.63 ± 6.68**   |
| K202 <sup>2.72b</sup> A              | 7.34 ± 0.17*      | 83.63 ± 4.25*    | 7.47 ± 0.15*      | 98.52 ± 4.88     |
| <b>Interaction with A-2</b>          |                   |                  |                   |                  |
| Y148 <sup>1.43b</sup> A              | 6.81 ± 0.41**     | 35.29 ± 4.82**   | NA**              | 16.66 ± 7.94**   |
| Y152 <sup>1.47b</sup> A              | 6.82 ± 2.86**     | 8.66 ± 4.22**    | NA**              | 0.69 ± 6.41**    |
| V194 <sup>2.64b</sup> A              | 7.98 ± 0.15       | 93.34 ± 4.31     | 7.88 ± 0.31       | 38.04 ± 3.82**   |
| L384 <sup>7.39b</sup> A              | 7.47 ± 1.06*      | 4.85 ± 3.17**    | 7.67 ± 0.45*      | 21.24 ± 5.30**   |
| L388 <sup>7.43b</sup> A              | 7.12 ± 1.76       | 0.28 ± 8.16**    | 7.49 ± 0.71       | 4.64 ± 4.93**    |
| <b>Interaction with B1-1 or B2-1</b> |                   |                  |                   |                  |
| E34 <sup>ECD</sup> A                 | 8.30 ± 0.10*      | 104.02 ± 3.78    | 8.28 ± 0.16       | 110.06 ± 4.67    |
| Q140 <sup>1.35b</sup> A              | 7.55 ± 0.12       | 100.29 ± 3.42    | 7.91 ± 0.24       | 92.05 ± 6.35     |
| L144 <sup>1.39b</sup> A              | 6.78 ± 0.81**     | 18.97 ± 5.12**   | 7.44 ± 0.73       | 13.68 ± 3.50**   |
| R380 <sup>7.35b</sup> A              | 7.38 ± 0.33*      | 68.18 ± 7.12**   | 7.87 ± 0.76       | 15.01 ± 3.12**   |
| F381 <sup>7.36b</sup> A              | 7.80 ± 0.14       | 99.14 ± 4.66     | 8.16 ± 0.15       | 111.53 ± 5.04    |
| <b>Interaction with B1-2 or B2-2</b> |                   |                  |                   |                  |
| W33 <sup>ECD</sup> A                 | 6.13 ± 0.21**     | 67.98 ± 7.52**   | 6.39 ± 0.40**     | 54.48 ± 6.48**   |
| K197 <sup>2.67b</sup> A              | 6.55 ± 0.47**     | 14.59 ± 1.82**   | NA**              | 3.95 ± 2.42**    |
| C226 <sup>3.29b</sup> A              | NA**              | 3.73 ± 2.46**    | NA**              | NA**             |
| V229 <sup>3.32b</sup> A              | 6.71 ± 0.19**     | 103.60 ± 8.02    | 7.34 ± 0.18**     | 111.90 ± 4.27    |
| F230 <sup>3.33b</sup> A              | 6.71 ± 0.32**     | 43.74 ± 4.70**   | 6.96 ± 0.58**     | 38.29 ± 7.02**   |
| T298 <sup>ECL2</sup> A               | 7.48 ± 0.18*      | 87.94 ± 4.55*    | 7.92 ± 0.38       | 79.69 ± 7.24**   |
| R299 <sup>ECL2</sup> A               | 6.98 ± 0.27**     | 87.81 ± 9.09     | 7.54 ± 0.18*      | 91.23 ± 3.49     |

cAMP accumulation data were analyzed using a three-parameter logistic equation to determine pEC<sub>50</sub> and E<sub>max</sub> values. pEC<sub>50</sub> is the negative logarithm of the molar concentration of agonist that induced half the maximal response. E<sub>max</sub> for mutants is expressed as a percentage of the response induced by the wild-type (WT) GLP-1R. All values are means ± SEM of at least three independent experiments conducted in quadruplicate. One-way ANOVA was used to determine statistical significance (\*\*P<0.01, \*P<0.05). NA, not active.

**Table S4. Interaction between GLP-1R and Boc5 or WB4-24.**

| <b>GLP-1R residue</b> | <b>Boc5</b>                                  | <b>WB4-24</b>                                |
|-----------------------|----------------------------------------------|----------------------------------------------|
| W33 <sup>ECD</sup>    | Stacking interaction                         | Stacking interaction                         |
| Q140 <sup>1.35b</sup> | Hydrophobic contacts                         | Hydrophobic contacts                         |
| L141 <sup>1.36b</sup> | Hydrophobic contacts                         | Hydrophobic contacts                         |
| L144 <sup>1.39b</sup> | Hydrophobic contacts                         | Hydrophobic contacts                         |
| Y145 <sup>1.40b</sup> | Stacking interaction                         | Stacking interaction                         |
| Y148 <sup>1.43b</sup> | Hydrophobic contacts                         | Hydrophobic contacts                         |
| Y152 <sup>1.47b</sup> | Hydrophobic contacts                         | Hydrophobic contacts                         |
| R190 <sup>2.60b</sup> | Stacking interaction                         | Stacking interaction                         |
| V194 <sup>2.64b</sup> | Hydrophobic contacts                         | Hydrophobic contacts                         |
| I196 <sup>2.66b</sup> | Hydrophobic contacts                         |                                              |
| K197 <sup>2.67b</sup> | Stacking interaction<br>Hydrophobic contacts | Stacking interaction<br>Hydrophobic contacts |
| D198 <sup>2.68b</sup> |                                              | Hydrophobic contacts                         |
| A200 <sup>2.70b</sup> | Hydrophobic contacts                         |                                              |
| L201 <sup>2.71b</sup> | Hydrophobic contacts                         | Hydrophobic contacts                         |
| K202 <sup>2.72b</sup> | Hydrophobic contacts                         | Hydrophobic contacts                         |
| C226 <sup>3.29b</sup> | Hydrophobic contacts                         | Hydrophobic contacts                         |
| V229 <sup>3.32b</sup> | Hydrophobic contacts                         | Hydrophobic contacts                         |
| F230 <sup>3.33b</sup> | Stacking interaction                         | Stacking interaction                         |
| M233 <sup>3.36b</sup> | Hydrophobic contacts                         |                                              |
| T298 <sup>ECL2</sup>  | Hydrogen bond                                | Hydrogen bond                                |
| R299 <sup>ECL2</sup>  | Salt bridge                                  | Salt bridge                                  |
| R380 <sup>7.35b</sup> | Salt bridge                                  | Salt bridge                                  |
| F381 <sup>7.36b</sup> | Hydrophobic contacts                         | Hydrophobic contacts                         |
| L384 <sup>7.39b</sup> | Hydrophobic contacts                         | Hydrophobic contacts                         |
| F385 <sup>7.40b</sup> |                                              | Hydrophobic contacts                         |
| L388 <sup>7.43b</sup> | Hydrophobic contacts                         | Hydrophobic contacts                         |

**Table S5. Comparison of in vivo and in vitro activities of peptidic and non-peptidic GLP-1R agonists.**

| Ligand                        | Peptide      | Small molecule |              |                 |                 |                 |
|-------------------------------|--------------|----------------|--------------|-----------------|-----------------|-----------------|
|                               | GLP-1        | Boc5           | WB4-24       | TT-OAD2         | LY3502970       | PF-06882961     |
| <b>In vitro activity</b>      |              |                |              |                 |                 |                 |
| cAMP response                 | Full agonist | Full agonist   | Full agonist | Partial agonist | Partial agonist | Full agonist    |
| $\beta$ -arrestin recruitment | Full agonist | NA             | NA           | NA              | NA              | Partial agonist |
| <b>In vivo activity</b>       |              |                |              |                 |                 |                 |
| Insulin release               | +            | +              | +            | +               | +               | +               |
| Appetite reduction            | +            | +              | +            | +               | +               | +               |
| HbA1c reduction               | +            | +              | +            | +               | +               | +               |
| Body weight reduction         | +            | +              | +            | ?               | ?               | +               |
| CVD benefit                   | +            | +              | +            | ?               | ?               | +               |

HbA1c, hemoglobin A1c; CVD, cardiovascular disease. NA, not active.
